# Supplementary material for: Highly sensitive tryptophan fluorescence probe for detecting rhythmic conformational changes of KaiC in the cyanobacterial circadian clock system
Source: Biochem J. 2022 Jul 19;479(14):1505–15. doi: 10.1042/BCJ20210544 (PMC9342895; doi:10.1042/BCJ20210544)
Supplement: Supplementary Material 1 [file BCJ-479-1505-s1.pdf]

Supplementary Figure S1. **The synthesized gene sequences.** Codons that correspond to W419 substitution and phospho-mimicking mutations are highlighted in red and yellow, respectively. Bases marked with lower case letters represent recognition sites.

CE CTTGGCATGACAAAGCAATCCGCGaatitc  
EE CTTGGCATGACAAAGCAATCCGCGaatitc  
EV CTTGGCATGACAAAGCAATCCGCGaatitc  
CV CTTGGCATGACAAAGCAATCCGCGaatitc  
F419W CTTGGCATGACAAAGCAATCCGCGaatitc  
F419W-CE CTTGGCATGACAAAGCAATCCGCGaatitc  
F419W-EE CTTGGCATGACAAAGCAATCCGCGaatitc  
F419W-EV CTTGGCATGACAAAGCAATCCGCGaatitc  
F419W-CV CTTGGCATGACAAAGCAATCCGCGaatitc
